# Supplementary material for: Functional test of pedotransfer functions to predict water flow and solute transport with the dual-permeability model MACRO
Source: Copernicus journal article supplement (doi:10.5194/hess-16-2069-2012), 2012-07-12
Supplement: Supplementary file 1 [file hess-16-2069-2012-supplement.pdf]

# Functional test of pedotransfer functions to predict water flow and solute transport with the dual-permeability model MACRO.

Moeys J.<sup>1</sup>, Larsbo M.<sup>1</sup>, Bergström L.<sup>1</sup>, Brown C.D.<sup>2</sup>, Coquet Y.<sup>3</sup>, Jarvis N.J.<sup>1</sup>

[1]{Department of Soil and Environment, SLU, Box 7014, 750 07 Uppsala, Sweden}

[2]{Environment Department, University of York, Heslington, York, YO10 5DD, UK}

[3]{AgroParisTech, UMR 1091 Environment and Arable Crops, BP01, 78850 Thiverval-Grignon, France}

Correspondence to: J. Moeys (Julien.Moeys@slu.se)

## Supplementary Material:

We present here a table (Table S1) with a selection of simulated components of the water balance, and time series (Figures S1 to S16) representing uncalibrated modelled versus simulated water and solute flow rates, and cumulated percolation, for all the soil profiles included in our study. Water flow rate is given in pore volumes percolated per day. Solute flow rate is given in fraction of applied mass drained per day. Accumulated water percolation is given in pore volumes. Accumulated solute drainage is given in fraction of applied mass. The total accumulated water percolation *measured* during the experiment, expressed in millimeters, is also given on the graph, as a reference. The term “pore volume” is defined here as the sum of the products of horizon’s porosities and thicknesses. The modelled hourly water and solute flow have been up-scaled so their time steps match those of the measurements.

*Notice that Table S1 presents the final accumulated **simulated** percolation, while figures S1 to S16 presents the final accumulated **measured** percolation (both in millimetres).*

**Table S1: Measurements duration and selected water balance components (rainfall, actual evapotranspiration and percolation) of each **simulation** presented in the study.**

| Profile name  | Start date <sup>1</sup> | End date <sup>1</sup> | Number<br>of days <sup>1</sup><br>[-] | Rainfall +<br>Irrigation<br>[mm] | Actual evapo-<br>transpiration<br>[mm] | Percolation<br>[mm] |
|---------------|-------------------------|-----------------------|---------------------------------------|----------------------------------|----------------------------------------|---------------------|
| Ekebo         | 2007-10-12              | 2008-08-18            | 311                                   | 514                              | 335                                    | 154                 |
| Fjärdingslöv  | 2007-10-12              | 2008-08-18            | 311                                   | 514                              | 331                                    | 158                 |
| Högåsa        | 2007-10-12              | 2008-12-19            | 434                                   | 742                              | 417                                    | 232                 |
| Kungsängen    | 2007-10-12              | 2008-12-19            | 434                                   | 742                              | 402                                    | 257                 |
| Vreta         | 2007-10-12              | 2008-08-18            | 311                                   | 514                              | 327                                    | 161                 |
| Mellby        | 1990-06-01              | 1991-04-04            | 307                                   | 565                              | 330                                    | 225                 |
| Lanna         | 2006-09-15              | 2008-08-26            | 711                                   | 1173                             | 710                                    | 434                 |
| Nåntuna       | 2006-09-15              | 2008-08-26            | 711                                   | 1173                             | 689                                    | 460                 |
| Villamblain 1 | 1996-01-29              | 1998-09-30            | 975                                   | 1571                             | 1554                                   | 147                 |
| Villamblain 2 | 1996-01-29              | 1998-09-30            | 975                                   | 1571                             | 1563                                   | 138                 |
| Cuckney       | 1994-11-18              | 1996-04-30            | 529                                   | 824                              | 527                                    | 306                 |
| Sonning       | 1994-11-18              | 1996-04-30            | 529                                   | 824                              | 526                                    | 309                 |
| Ludford       | 1994-11-18              | 1996-04-30            | 529                                   | 824                              | 526                                    | 307                 |
| Enborne       | 1994-11-18              | 1996-04-30            | 529                                   | 824                              | 531                                    | 303                 |
| Isleham       | 1994-11-18              | 1996-04-30            | 529                                   | 824                              | 663                                    | 181                 |
| Brimstone     | 1994-12-16              | 1995-01-23            | 38                                    | 114                              | 52                                     | 63                  |

<sup>1</sup> Dates range and the number of simulation days correspond to the period where measurements were made. The entire simulation period (not on the table) does include a warm-up period. The starting date is also the solute application date.

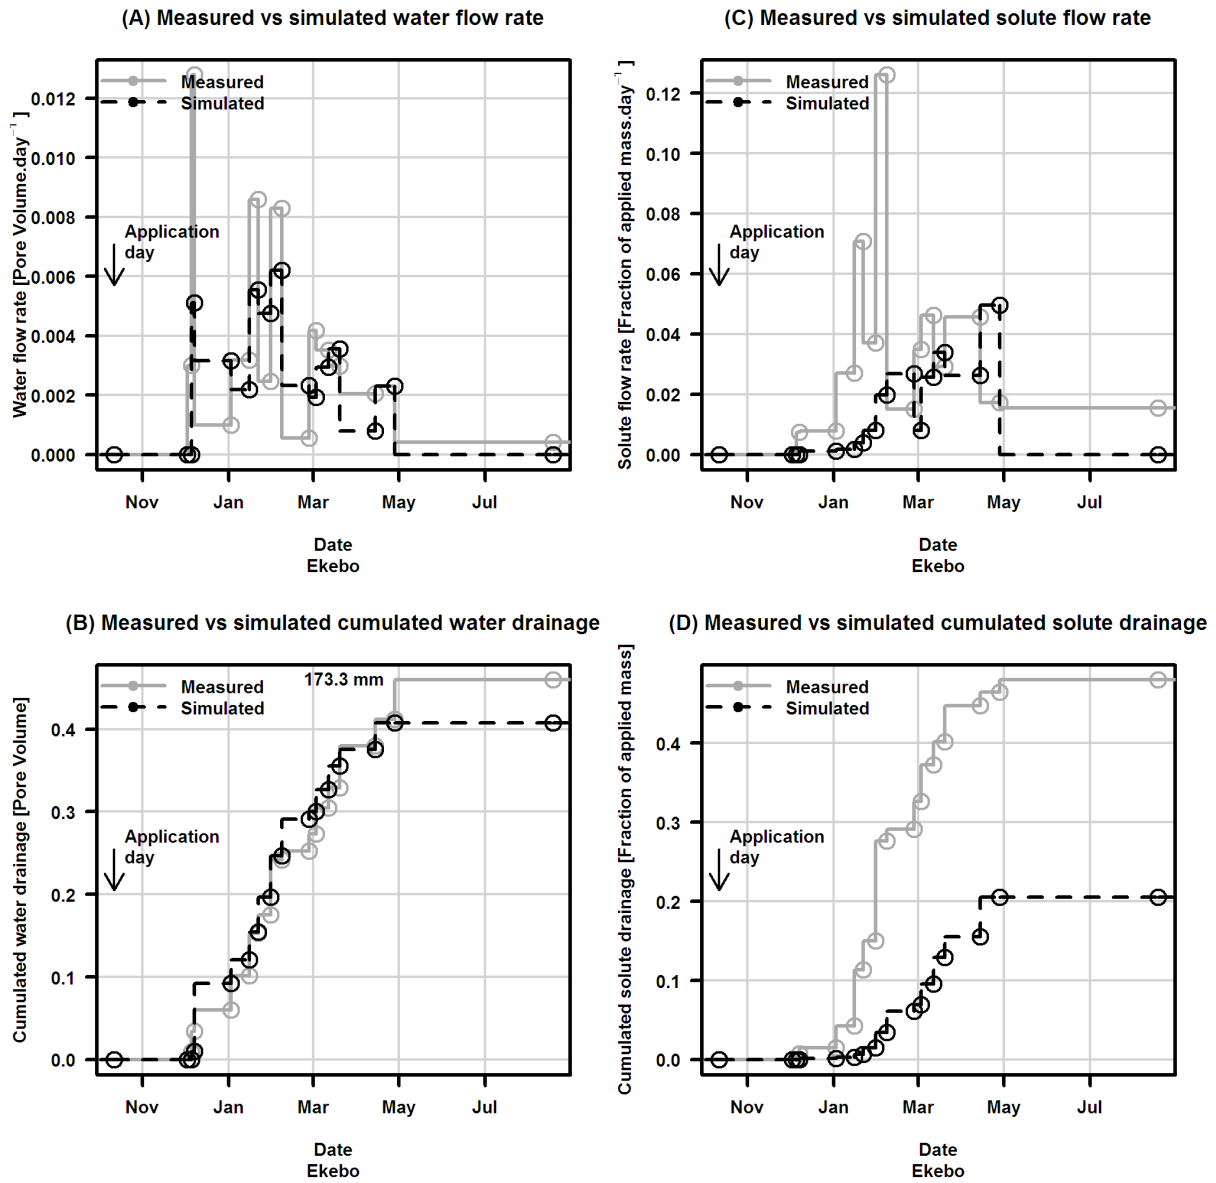

Figure S1. Time series of measured versus simulated water (left) and solute (right) flow rate (up) and accumulated percolation (down) for Ekebo soil.

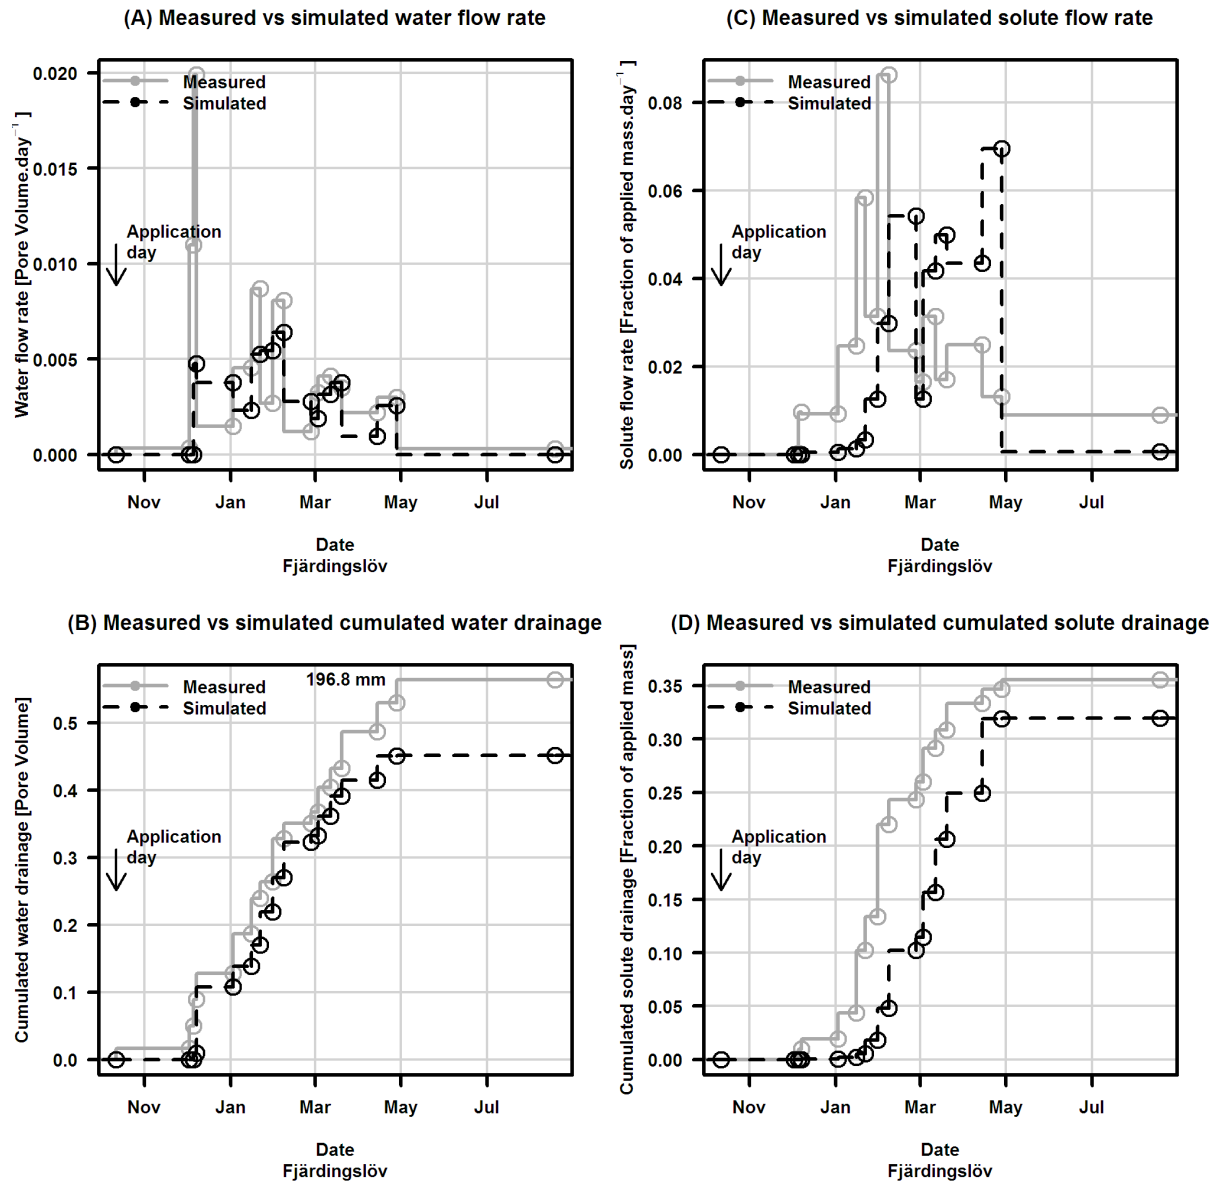

Figure S2. Time series of measured versus simulated water (left) and solute (right) flow rate (up) and accumulated percolation (down) for Fjärdingslöv soil.

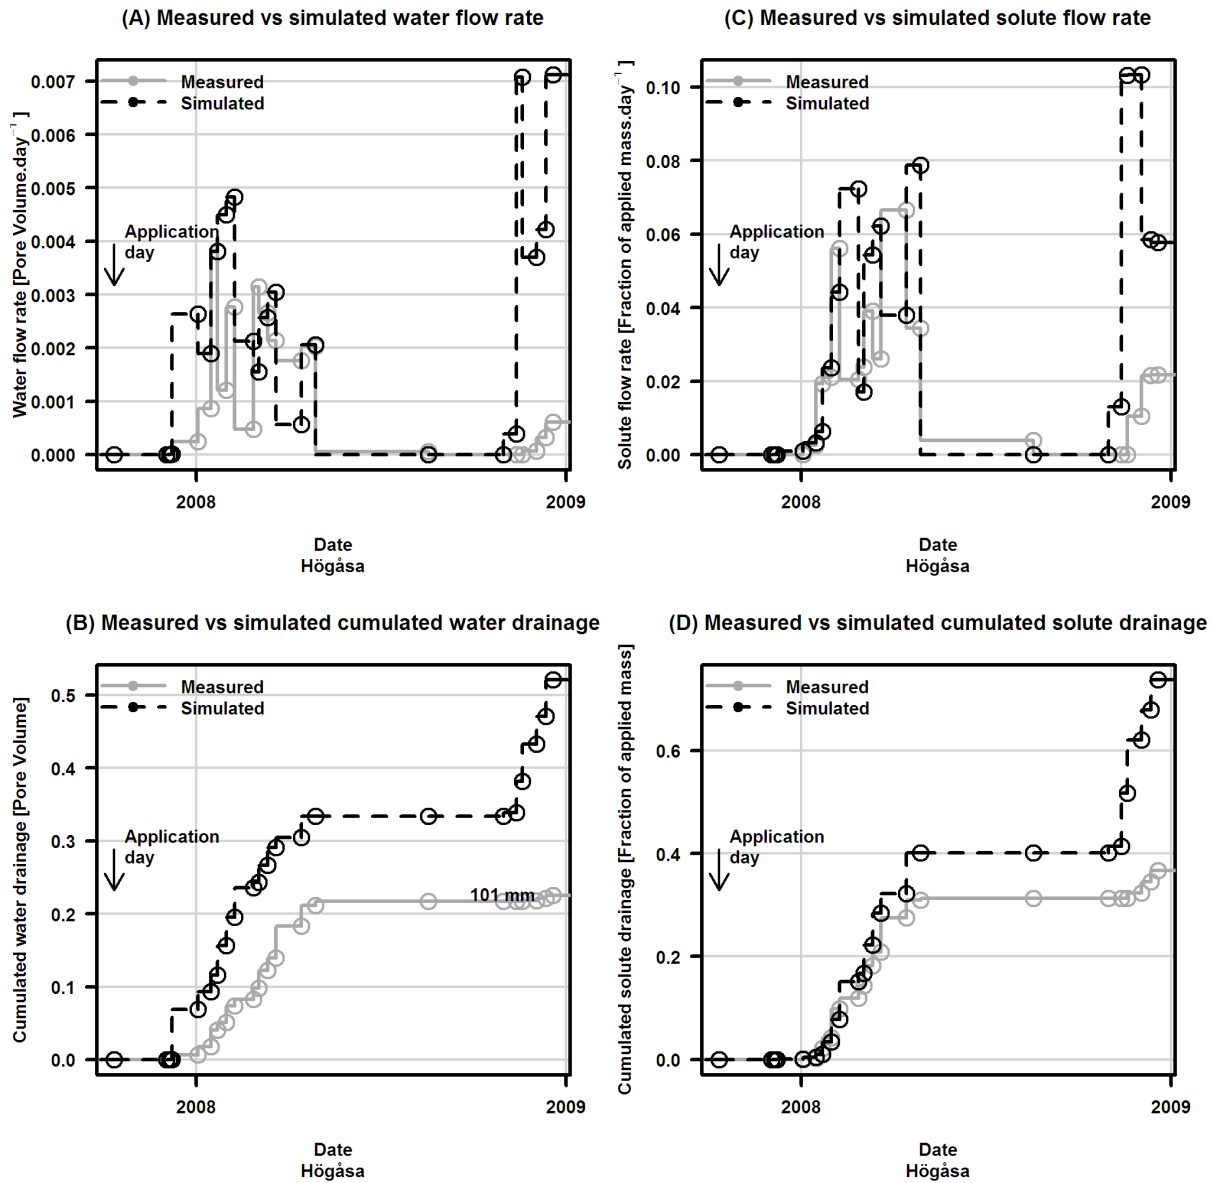

40

41 Figure S3. Time series of measured versus simulated water (left) and solute (right) flow rate

42 (up) and accumulated percolation (down) for Högåsa soil.

43

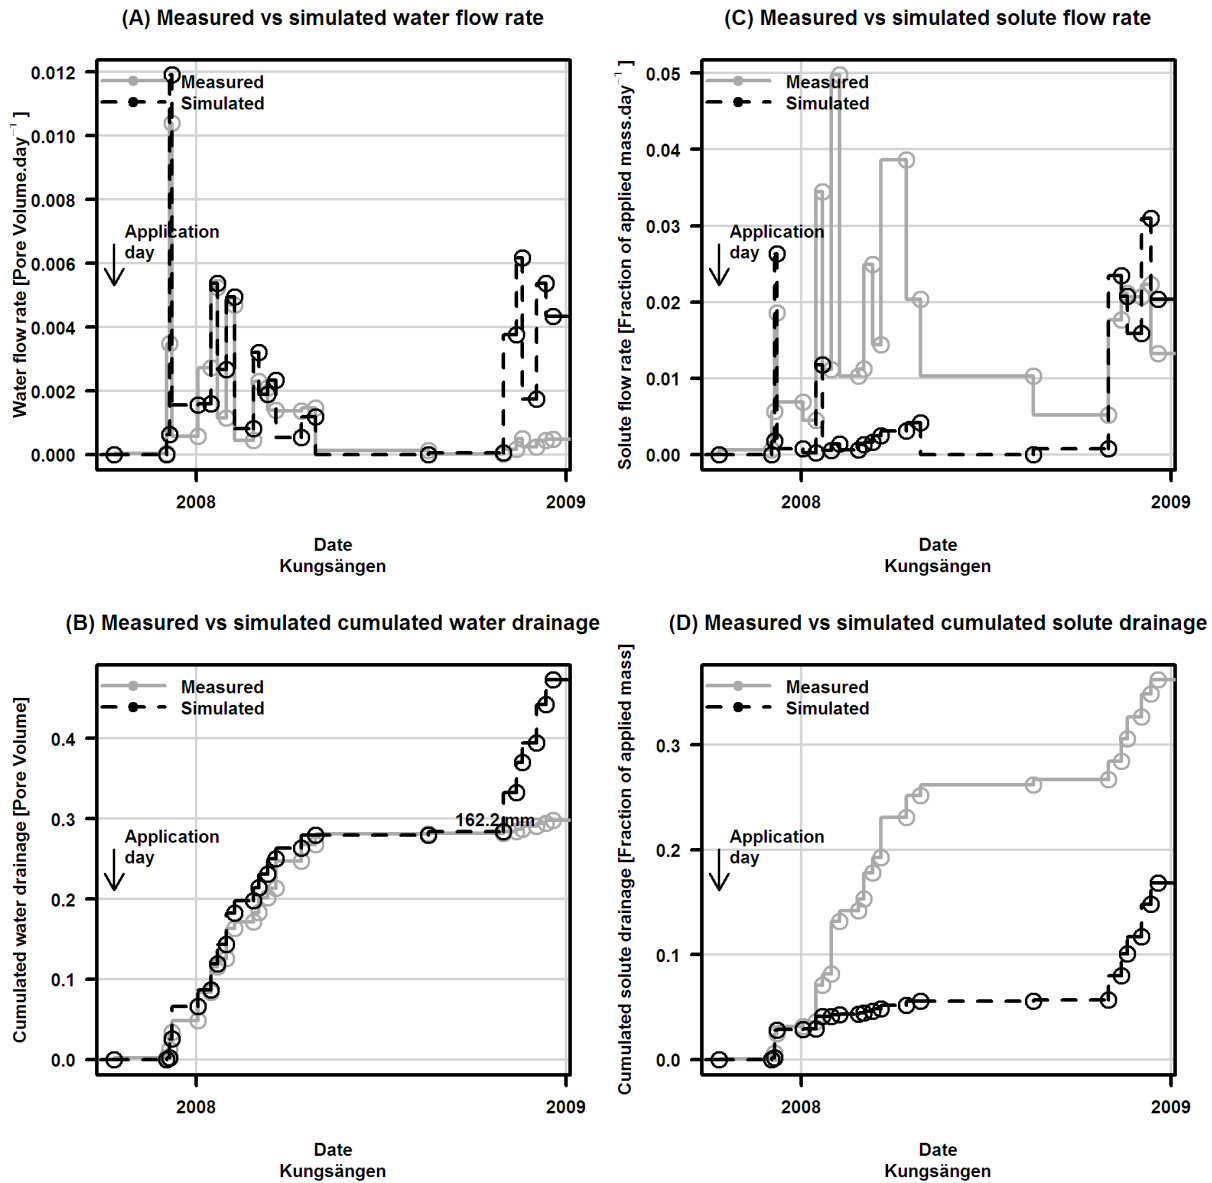

44

45 Figure S4. Time series of measured versus simulated water (left) and solute (right) flow rate  
 46 (up) and accumulated percolation (down) for Kungsängen soil.

47

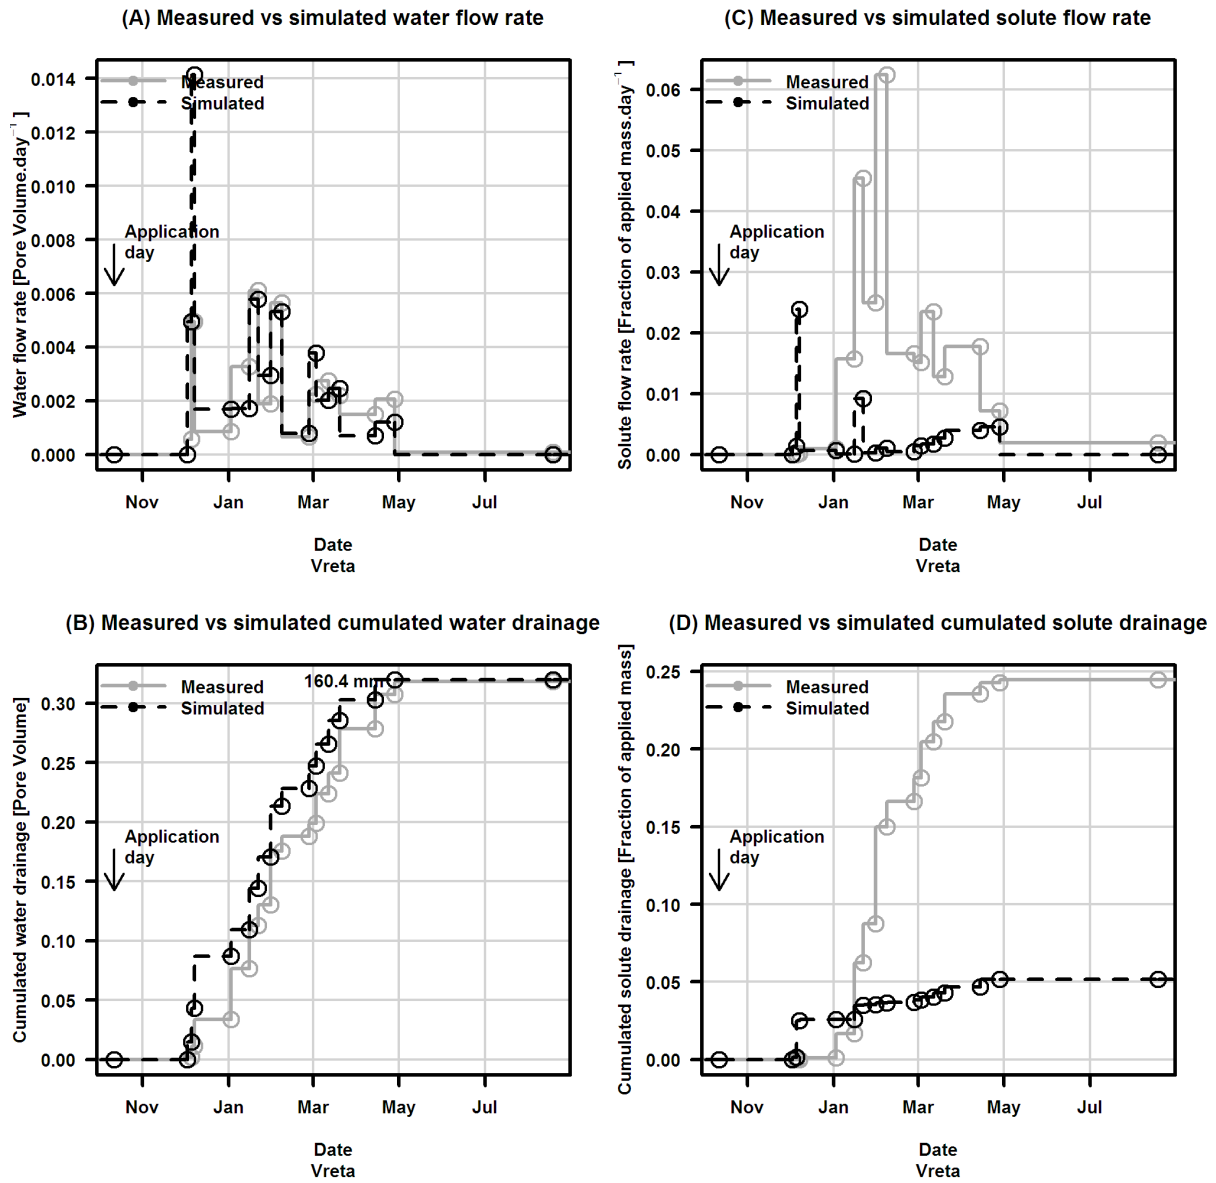

48

49 Figure S5. Time series of measured versus simulated water (left) and solute (right) flow rate  
 50 (up) and accumulated percolation (down) for Vreta soil.

51

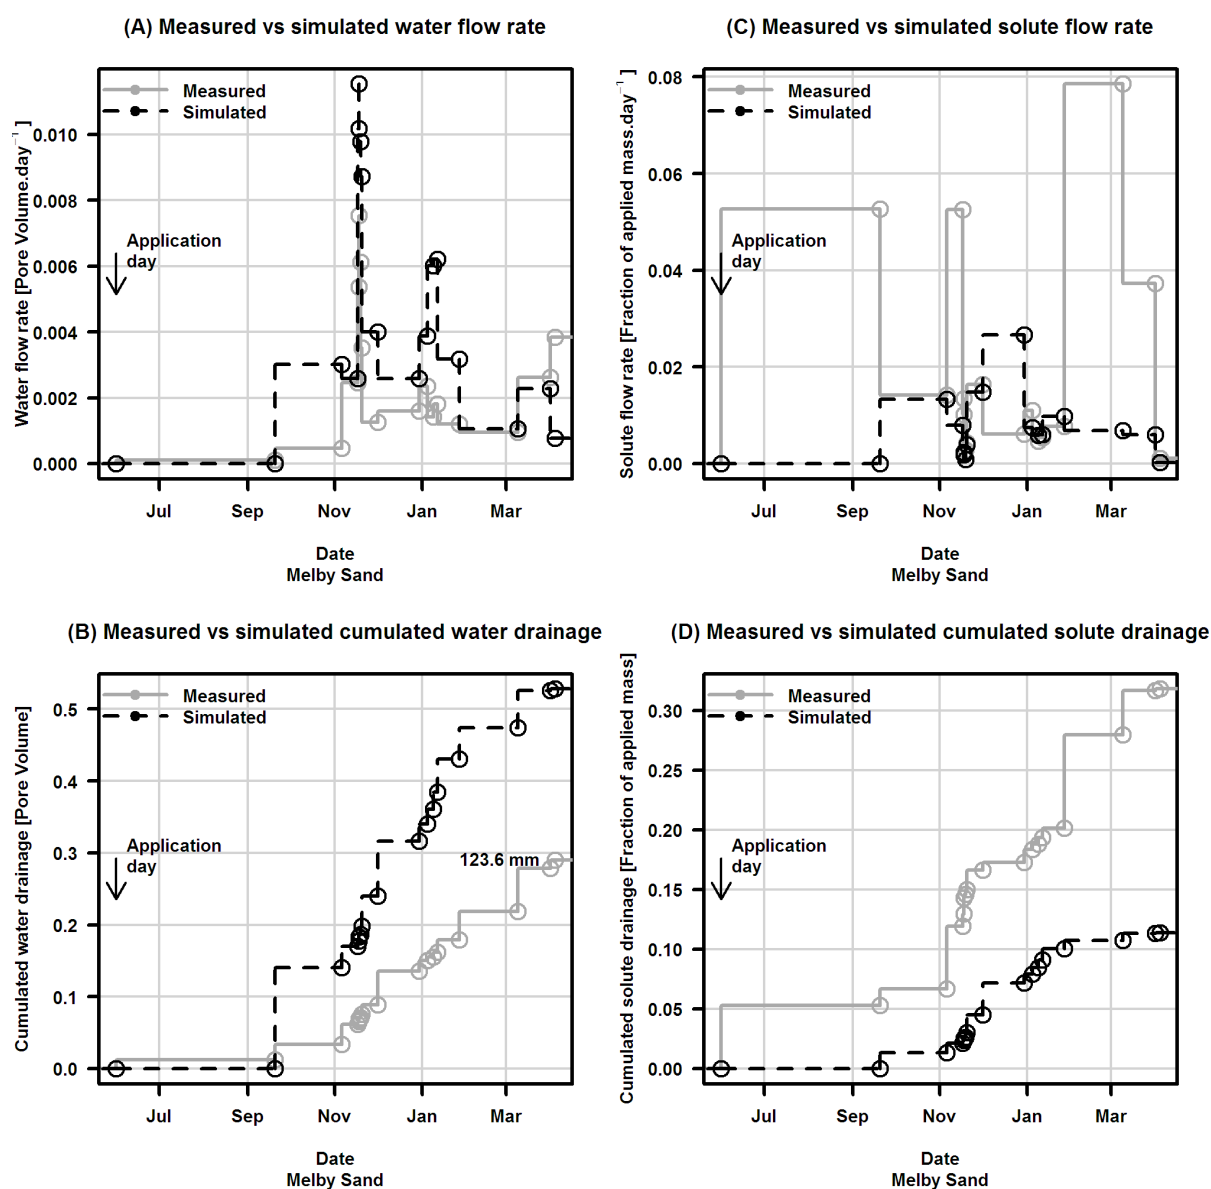

Figure S6. Time series of measured versus simulated water (left) and solute (right) flow rate (up) and accumulated percolation (down) for Mellby soil.



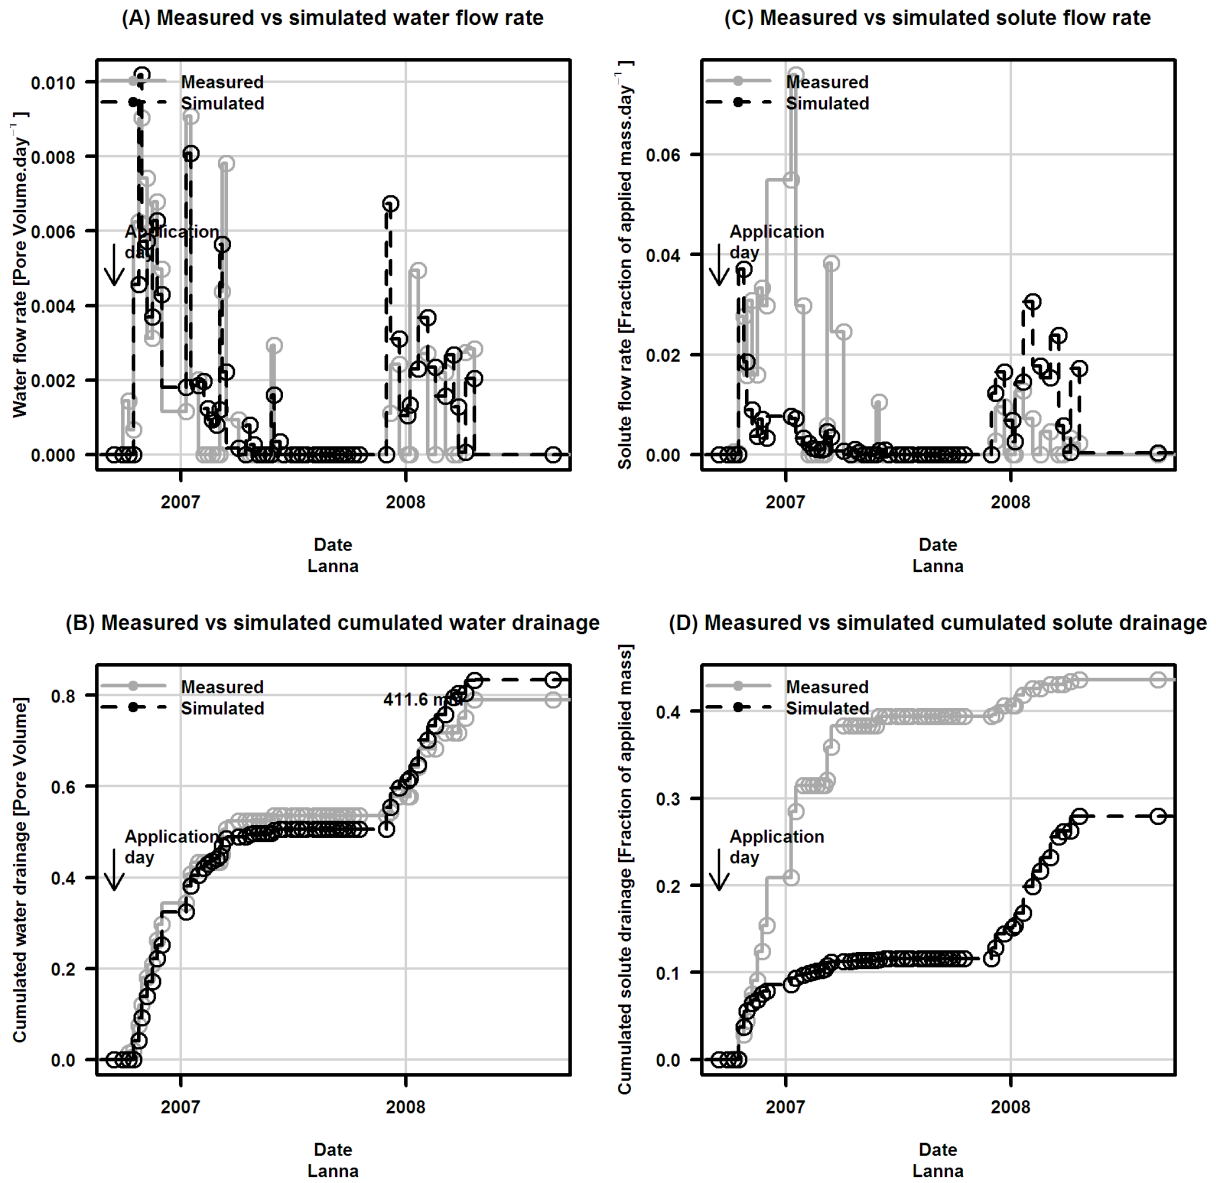

Figure S7. Time series of measured versus simulated water (left) and solute (right) flow rate (up) and accumulated percolation (down) for Lanna soil.

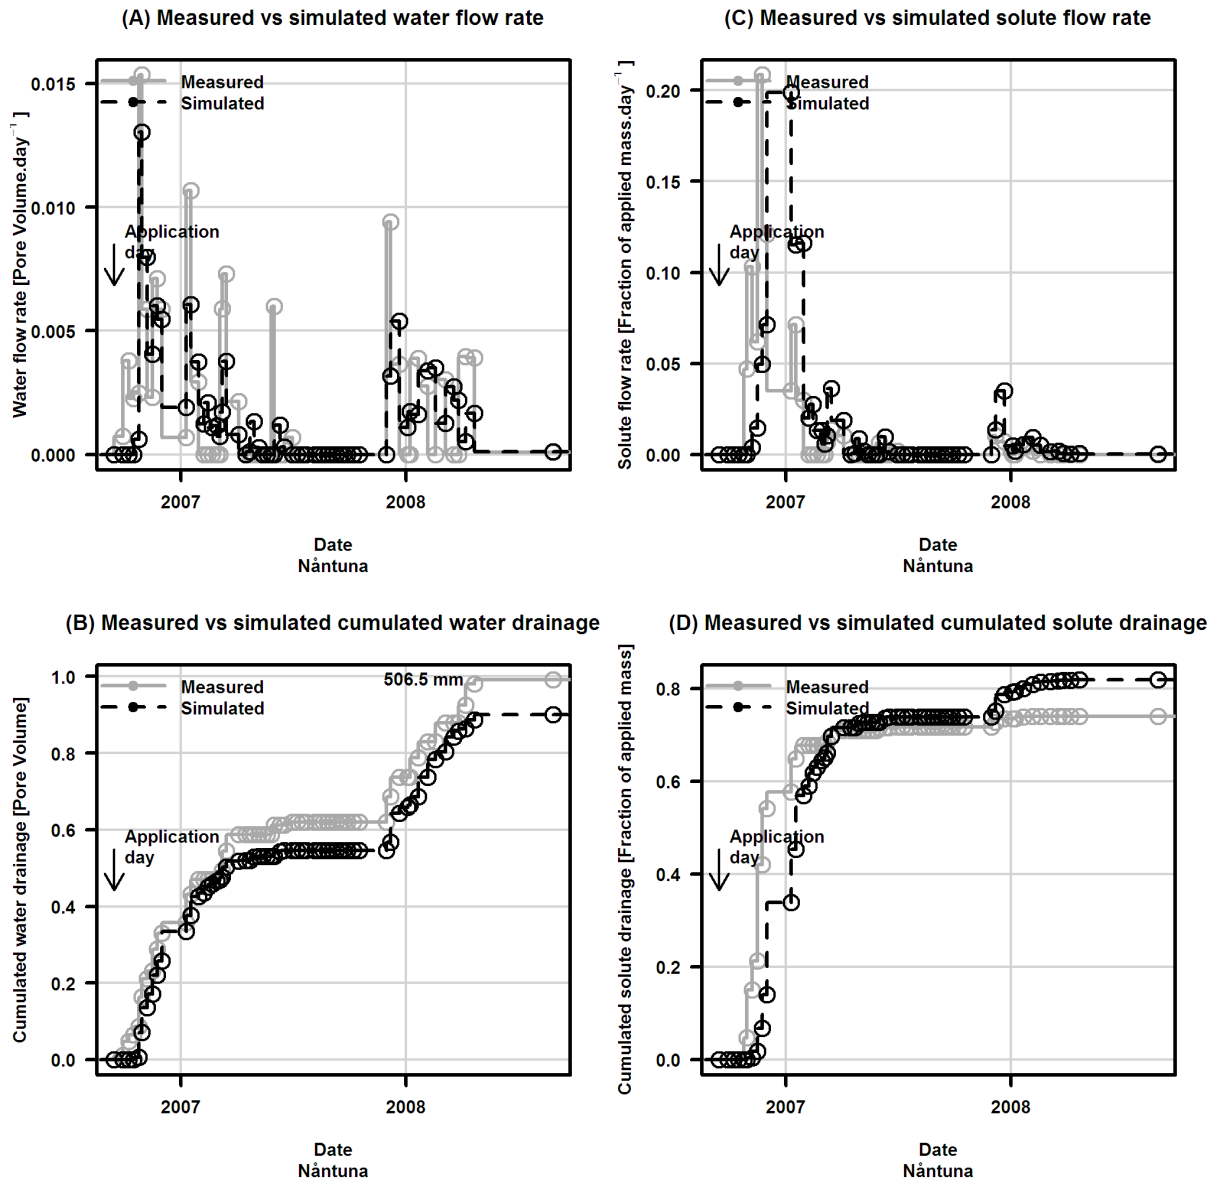

Figure S8. Time series of measured versus simulated water (left) and solute (right) flow rate (up) and accumulated percolation (down) for Nântuna soil.

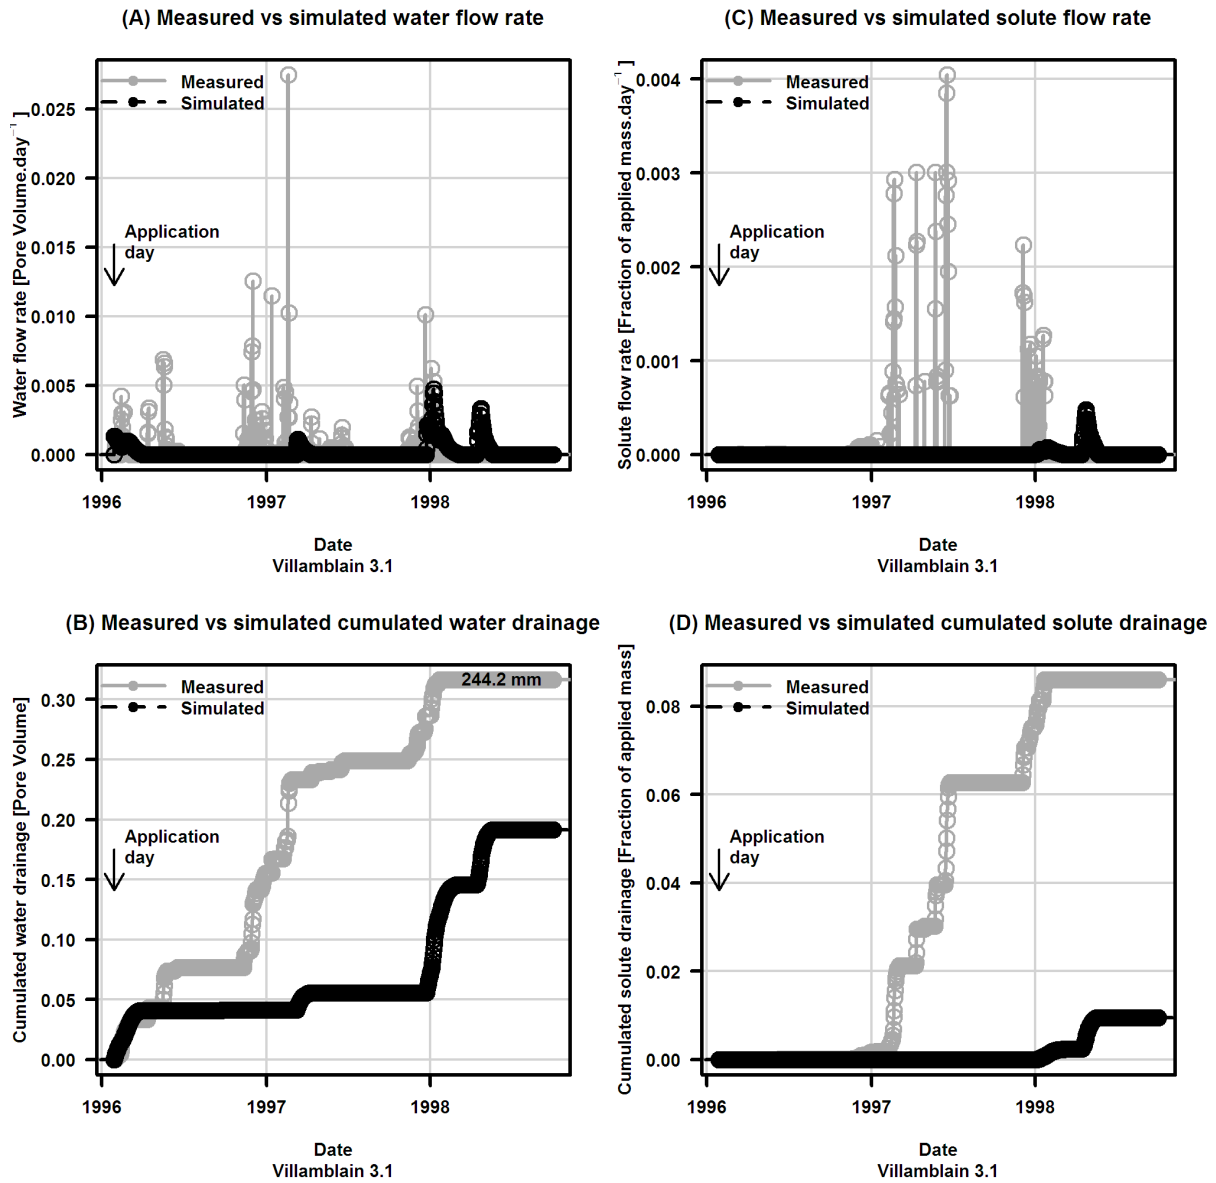

Figure S9. Time series of measured versus simulated water (left) and solute (right) flow rate (up) and accumulated percolation (down) for Villamblain 3.1 soil.

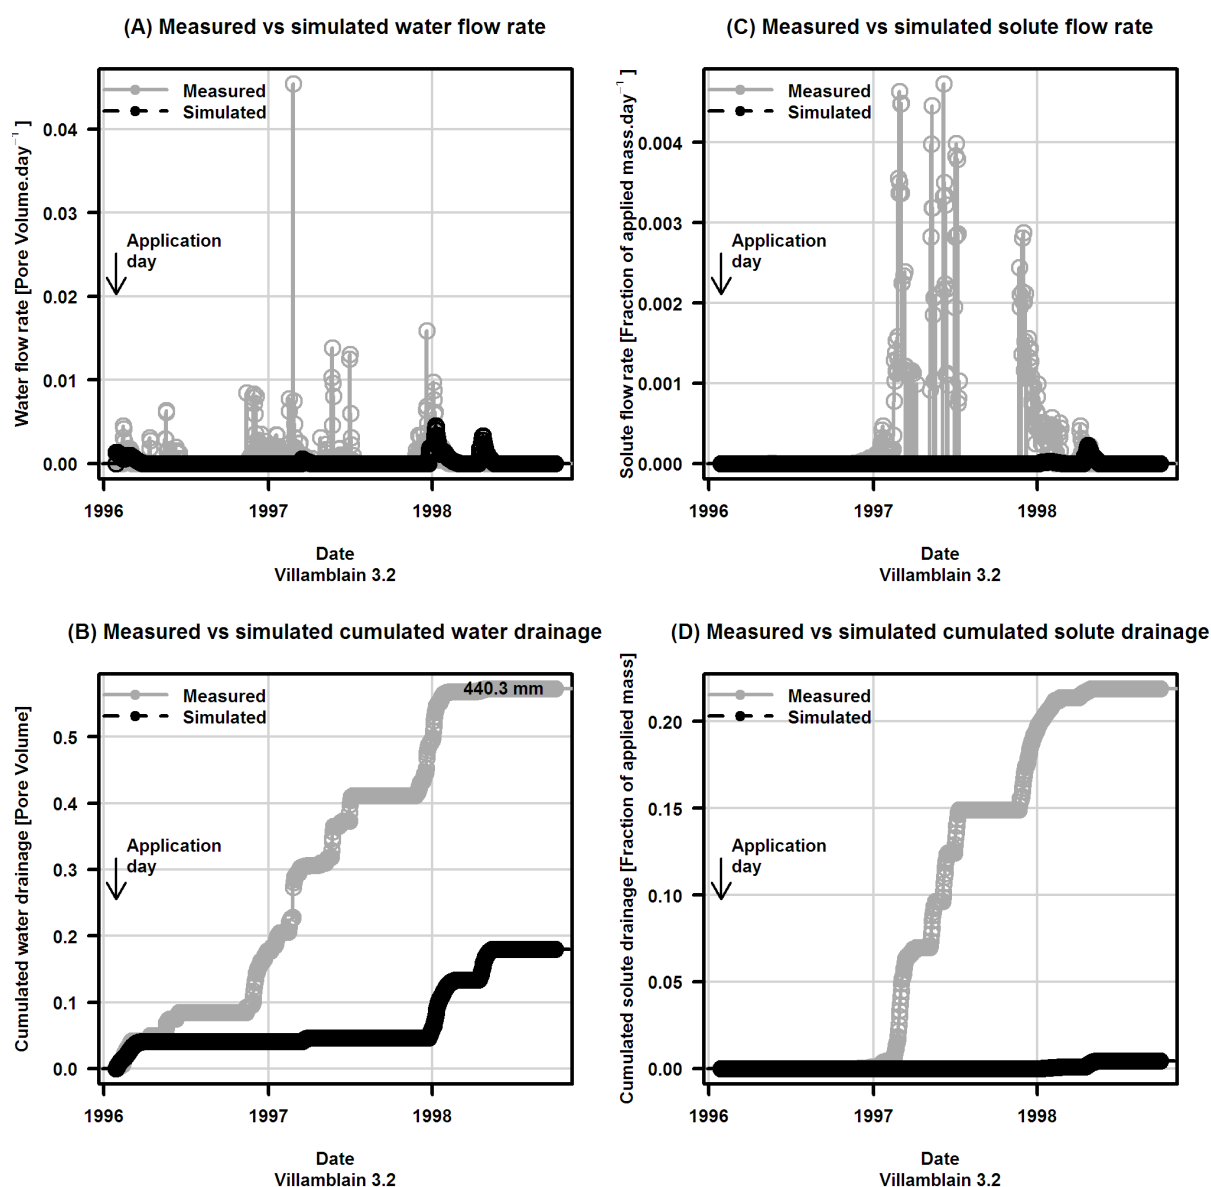

68

69 Figure S10. Time series of measured versus simulated water (left) and solute (right) flow rate  
 70 (up) and accumulated percolation (down) for Villamblain 3.2 soil.

71

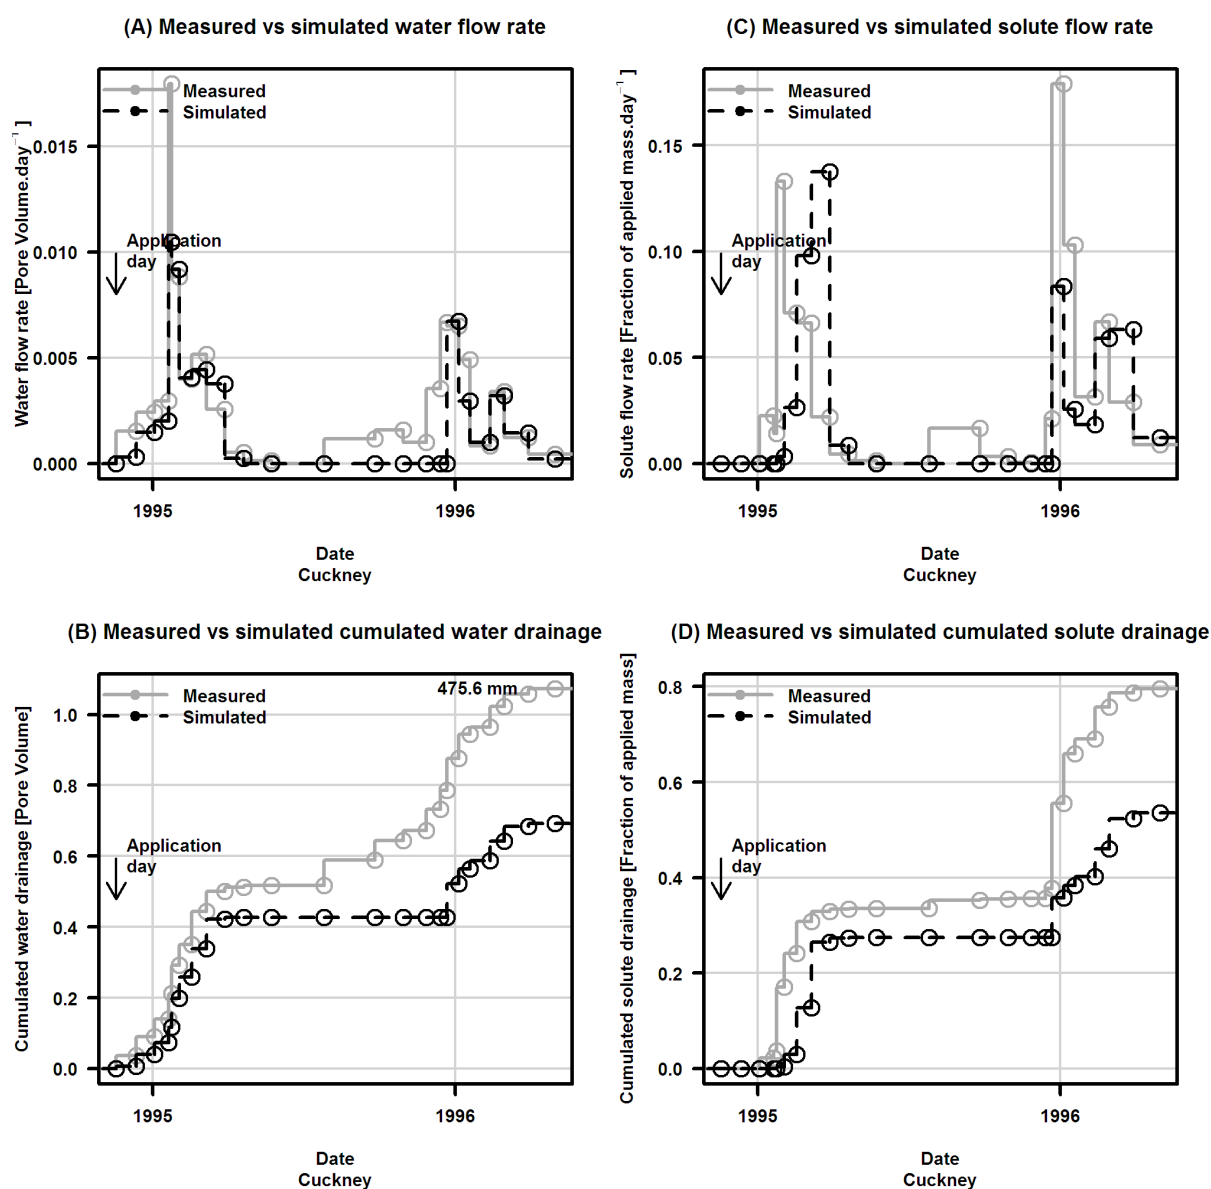

Figure S11. Time series of measured versus simulated water (left) and solute (right) flow rate (up) and accumulated percolation (down) for Cuckney soil.

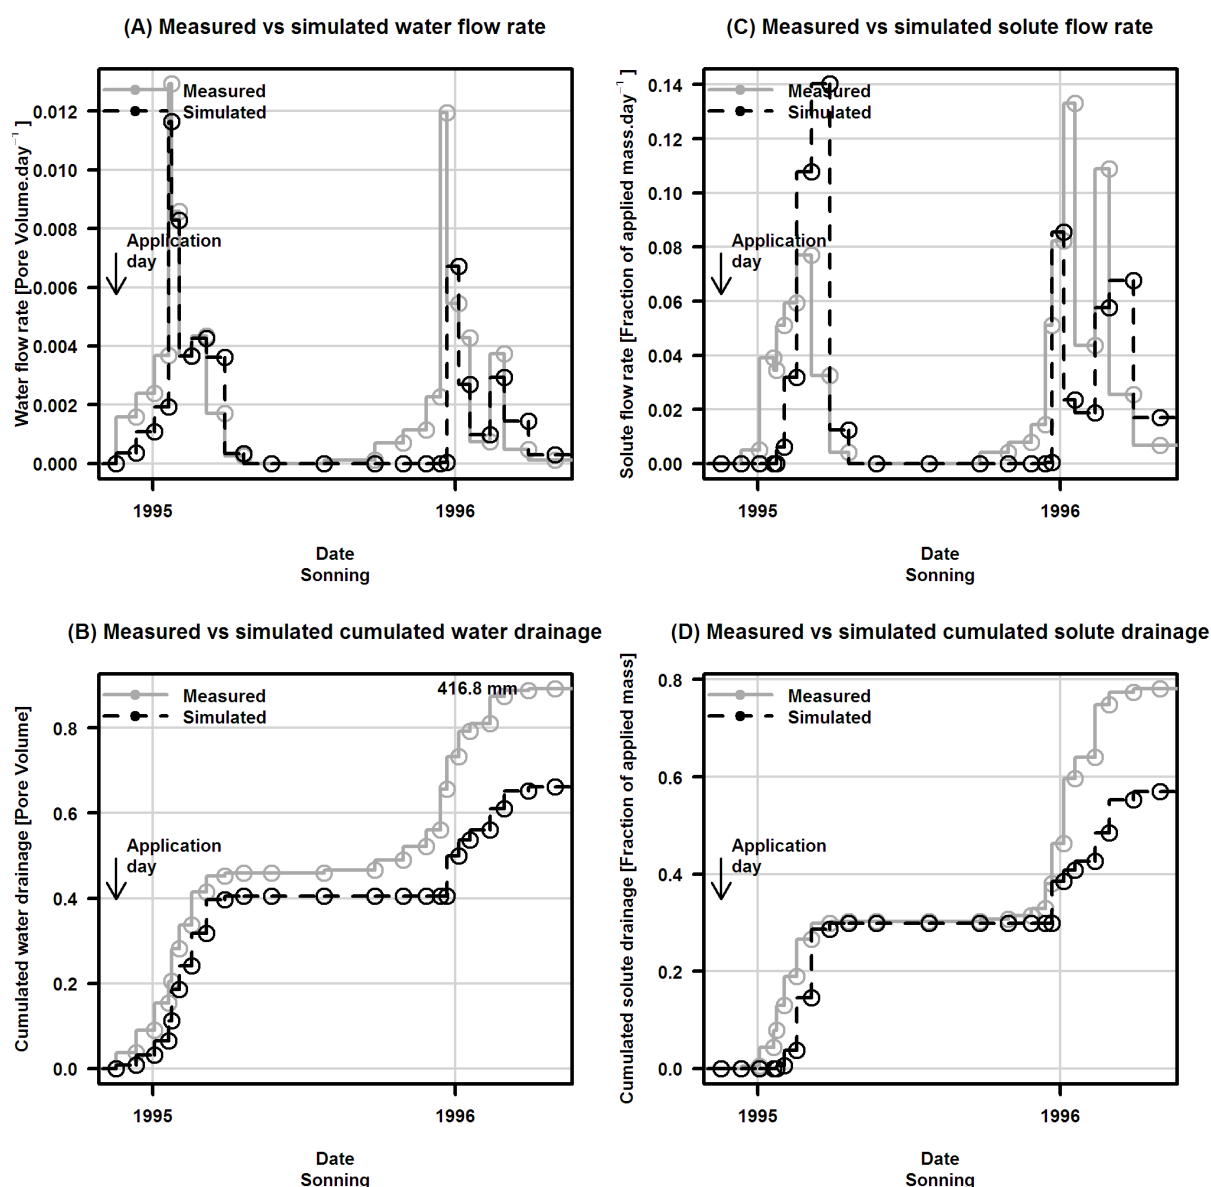

76

77 Figure S12. Time series of measured versus simulated water (left) and solute (right) flow rate  
 78 (up) and accumulated percolation (down) for Sonning soil.

79

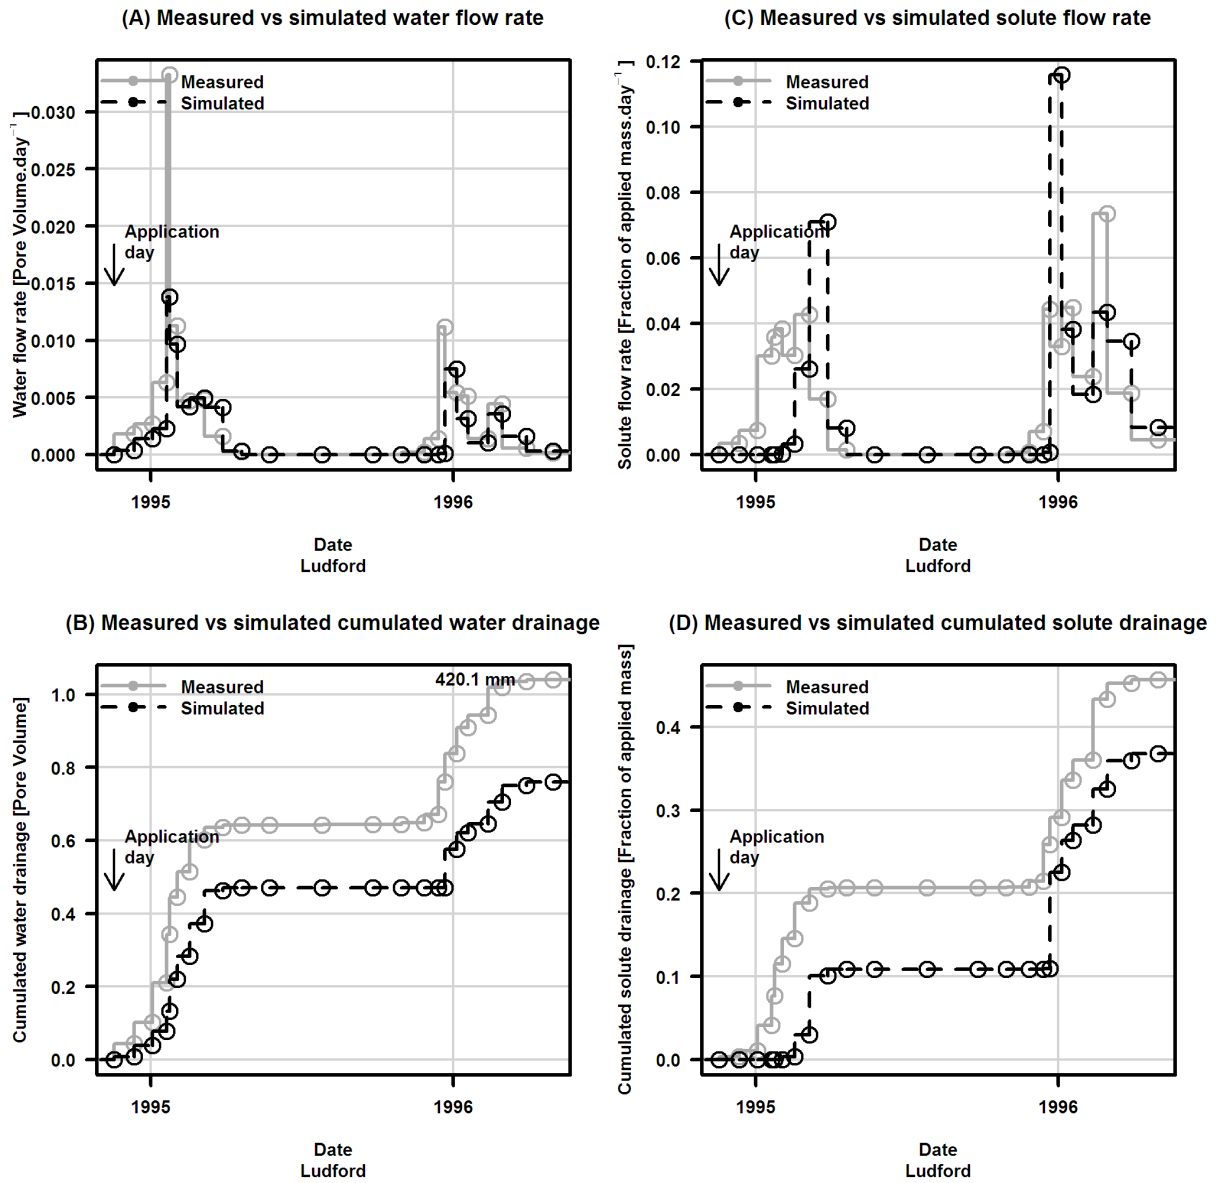

80

81 Figure S13. Time series of measured versus simulated water (left) and solute (right) flow rate

82 (up) and accumulated percolation (down) for Ludford soil.

83

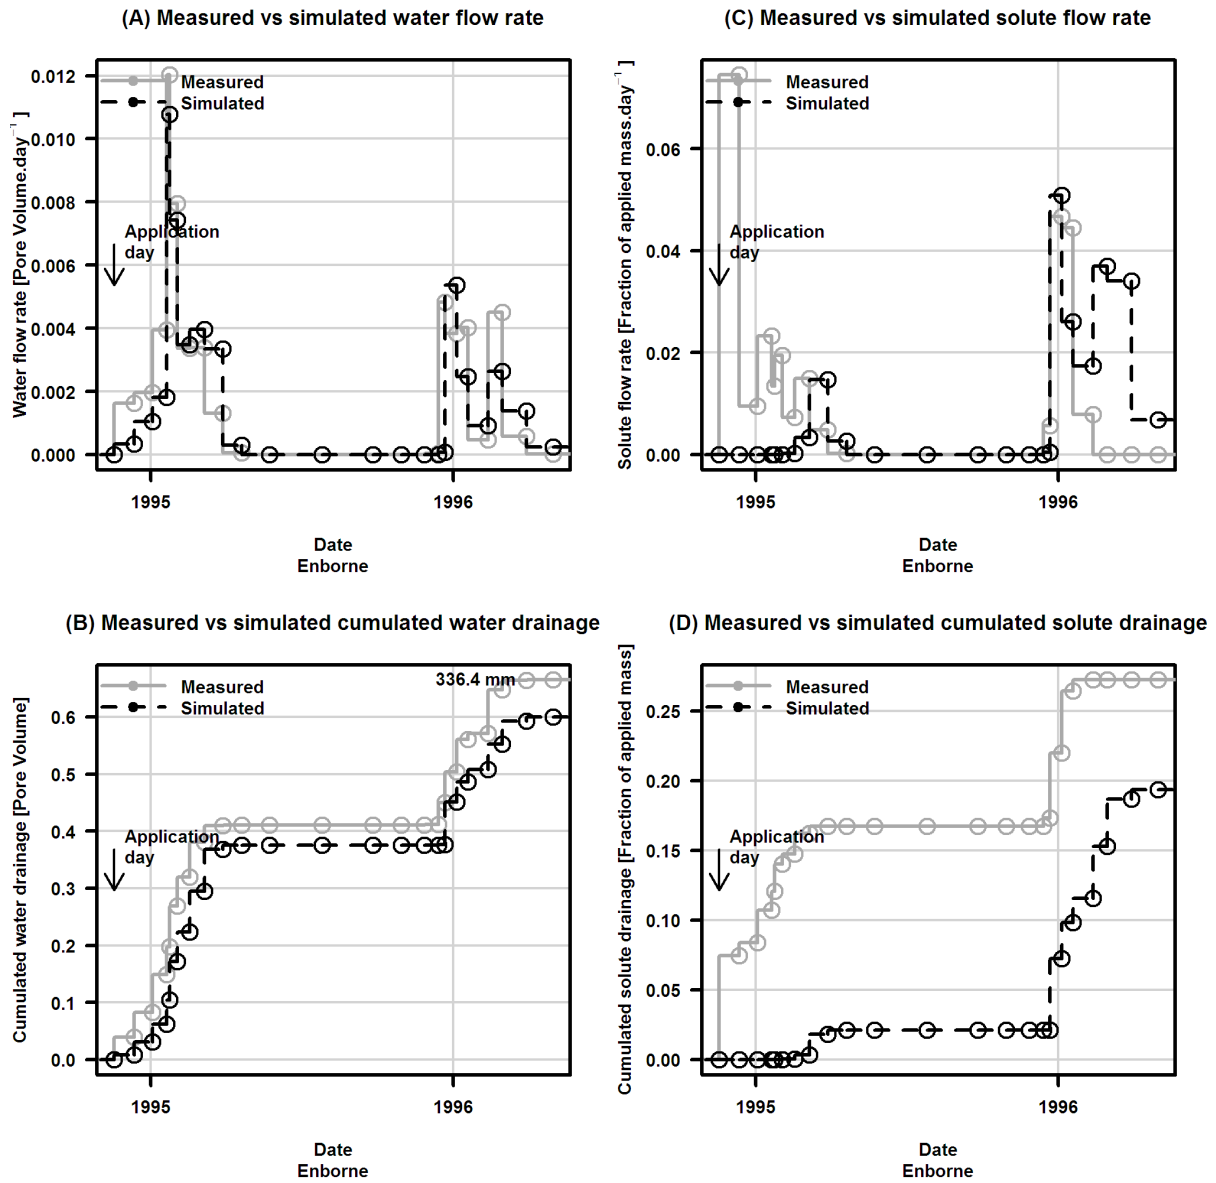

84

85 Figure S14. Time series of measured versus simulated water (left) and solute (right) flow rate

86 (up) and accumulated percolation (down) for Enborne soil.

87



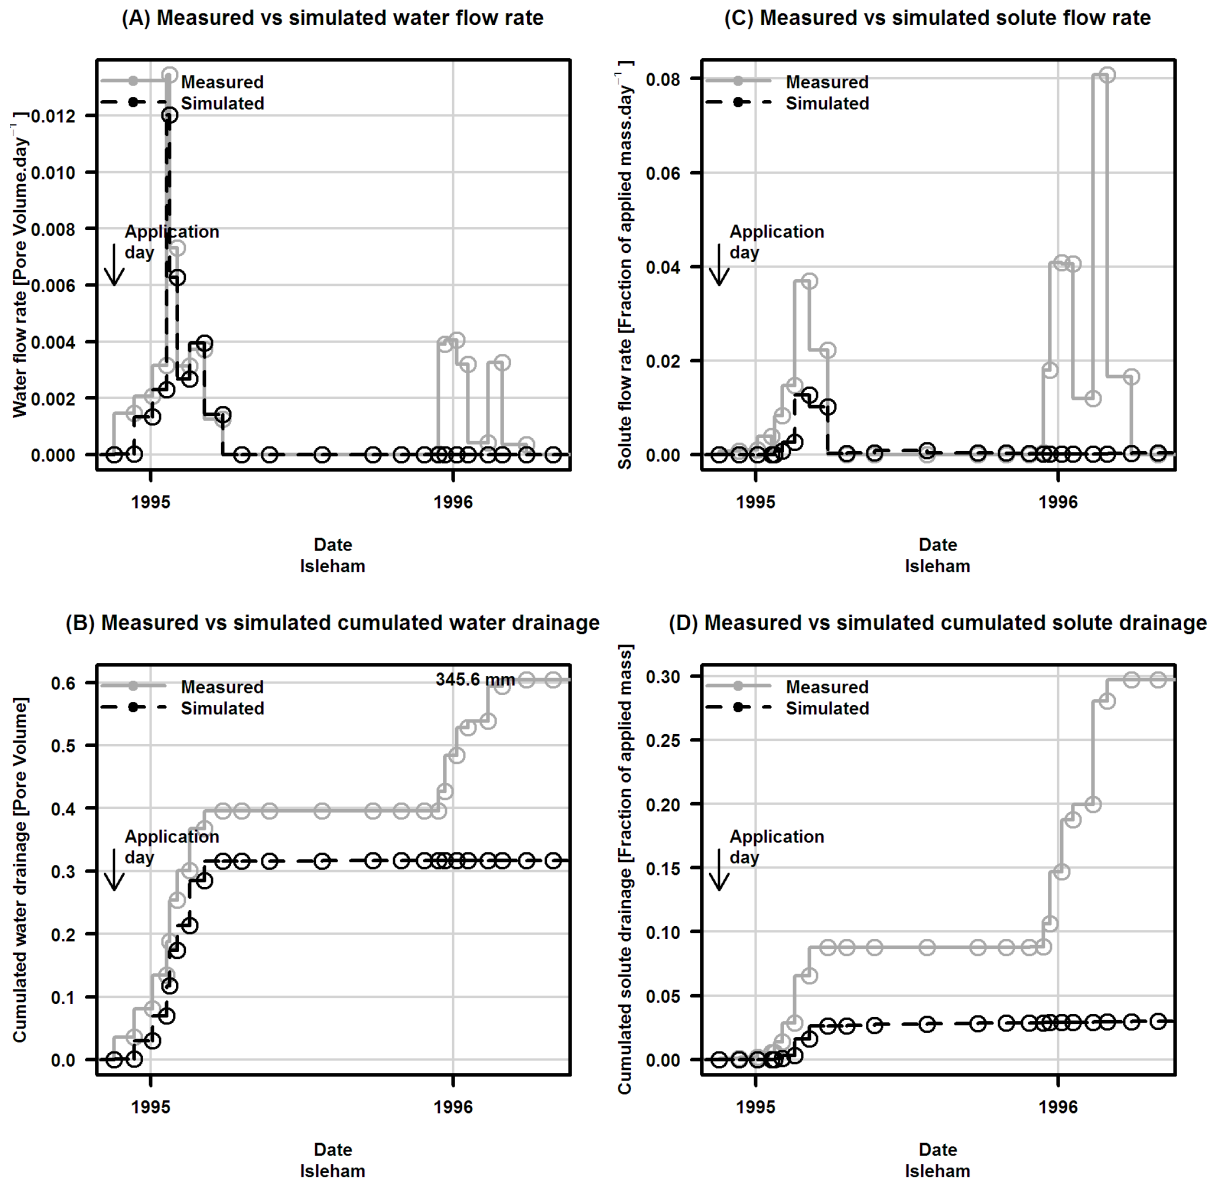

88

89 Figure S15. Time series of measured versus simulated water (left) and solute (right) flow rate

90 (up) and accumulated percolation (down) for Isleham soil.

91

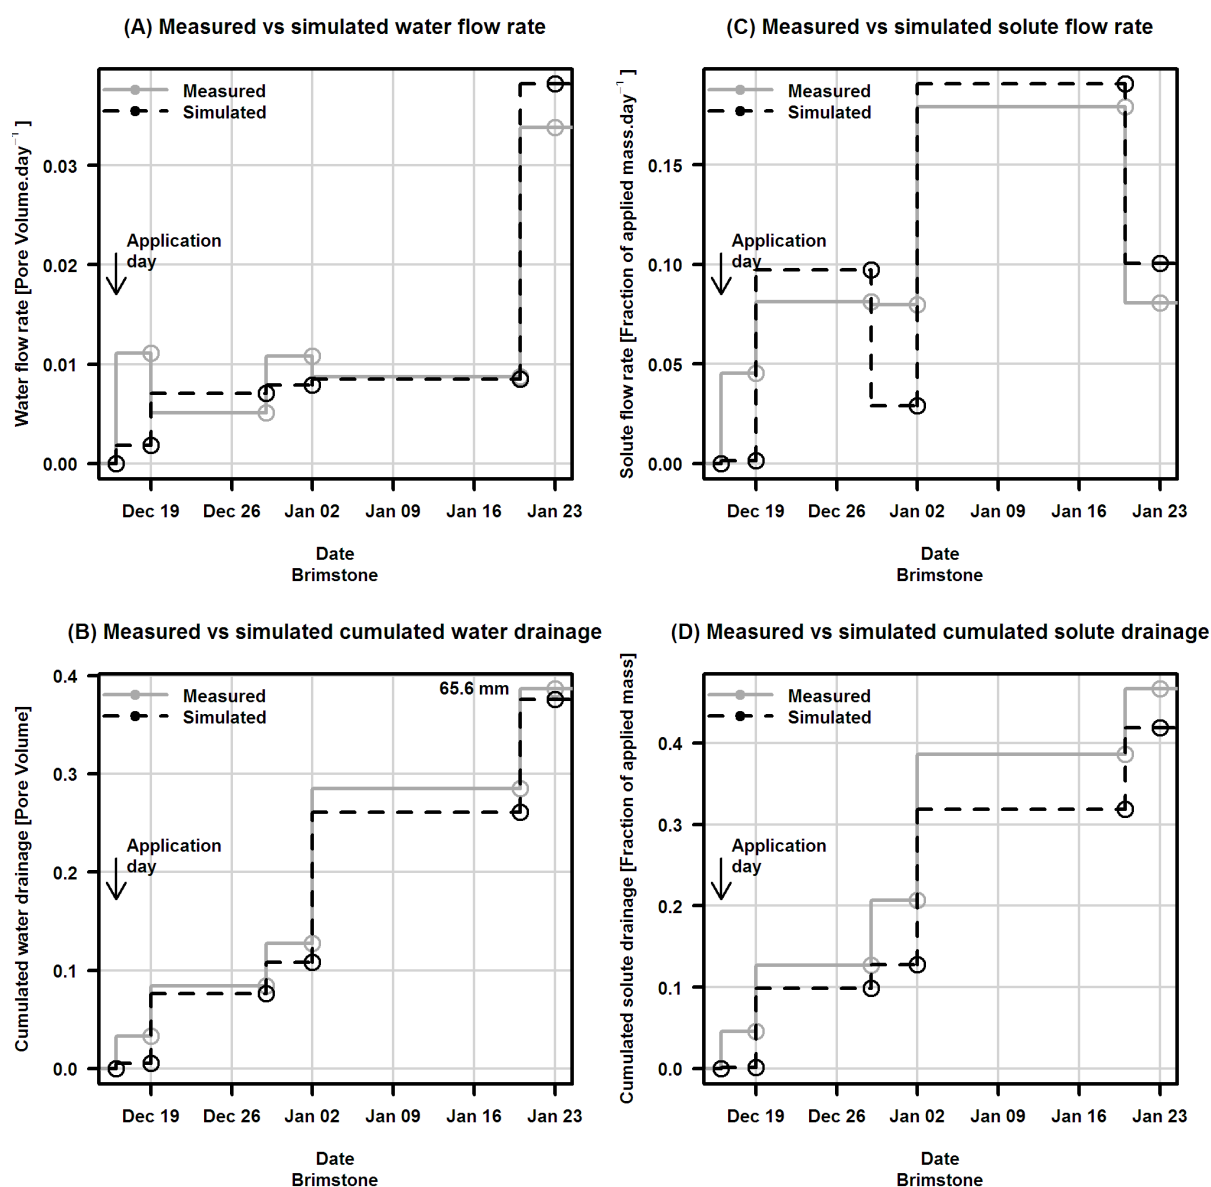

92

93 Figure S16. Time series of measured versus simulated water (left) and solute (right) flow rate  
 94 (up) and accumulated percolation (down) for Brimstone soil.
